# Supplementary material for: ASF1B Promotes Oncogenesis in Lung Adenocarcinoma and Other Cancer Types
Source: PubMed Central journal article supplement (PMC8459715; doi:10.3389/fonc.2021.731547), 2021-09-09

Survival Plot for the CpG cg25274248 in KIRP

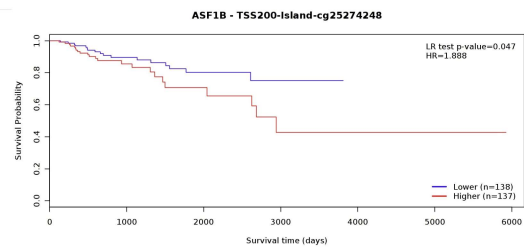

Survival Plot for the CpG cg26259181 in LGG

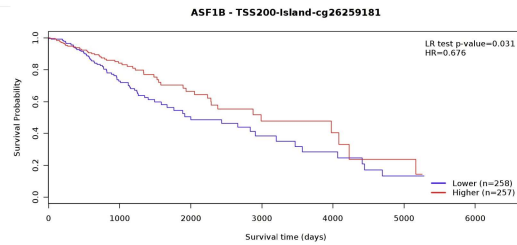

Survival Plot for the CpG cg25274248 in LIHC

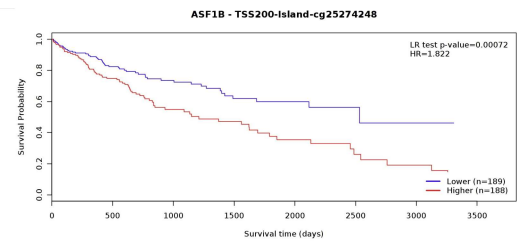

Survival Plot for the CpG cg26259181 in LUAD

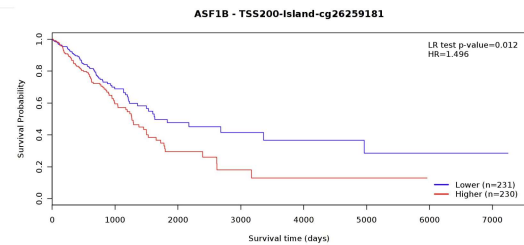

Survival Plot for the CpG cg06391548 in STAD

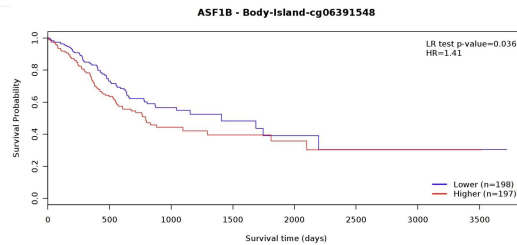

Supplement: DataSheet_1.pdf [file DataSheet_1.pdf]
