# Supplementary material for: ASF1B Promotes Oncogenesis in Lung Adenocarcinoma and Other Cancer Types
Source: PubMed Central journal article supplement (PMC8459715; doi:10.3389/fonc.2021.731547), 2021-09-09

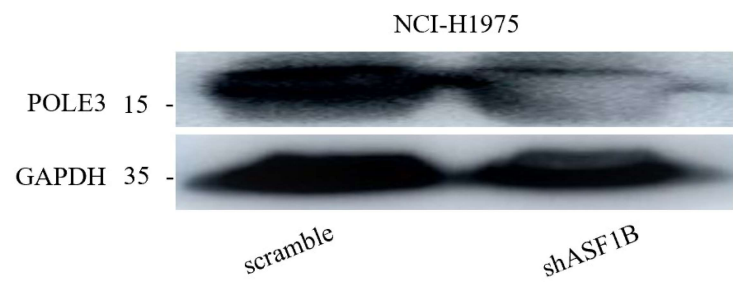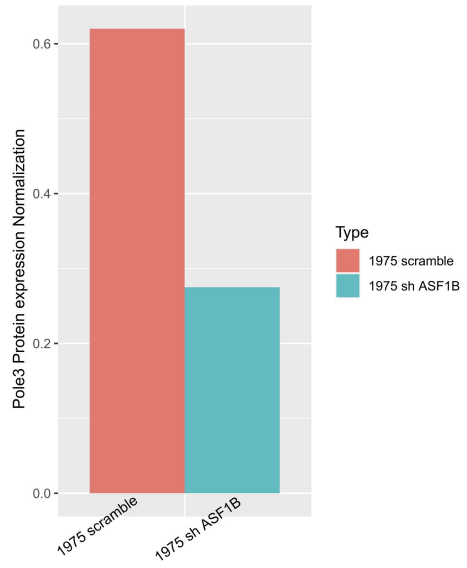

Supplement: DataSheet_6.pdf [file DataSheet_6.pdf]
