# Supplementary material for: ASF1B Promotes Oncogenesis in Lung Adenocarcinoma and Other Cancer Types
Source: PubMed Central journal article supplement (PMC8459715; doi:10.3389/fonc.2021.731547), 2021-09-09
Supplement: DataSheet_7.pdf [file DataSheet_7.pdf]

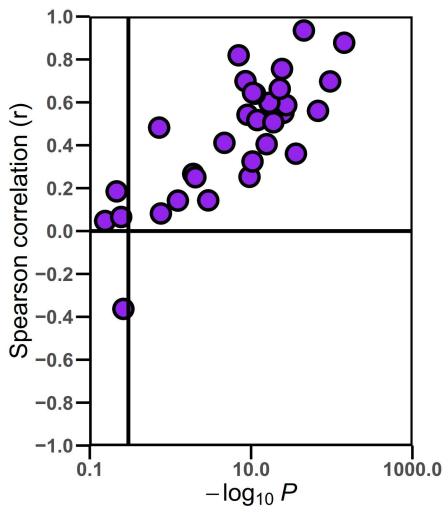

Correlation between ASF1B and CKS1B in GTEx

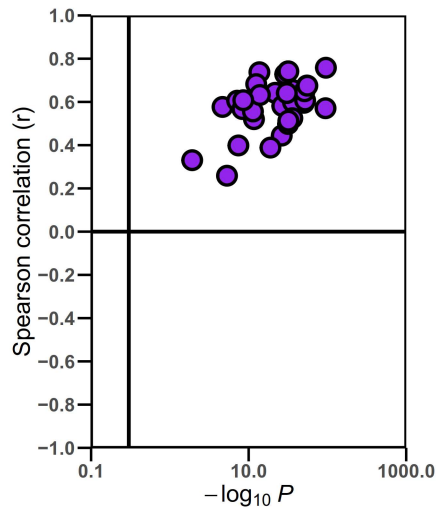

Correlation between ASF1B and CKS1B in pan-cancers

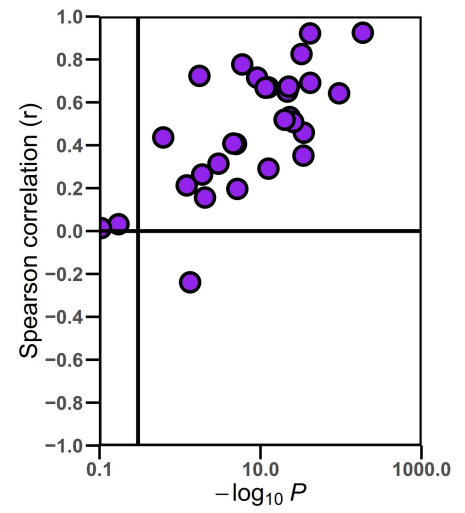

Correlation between ASF1B and DHFR in GTEx

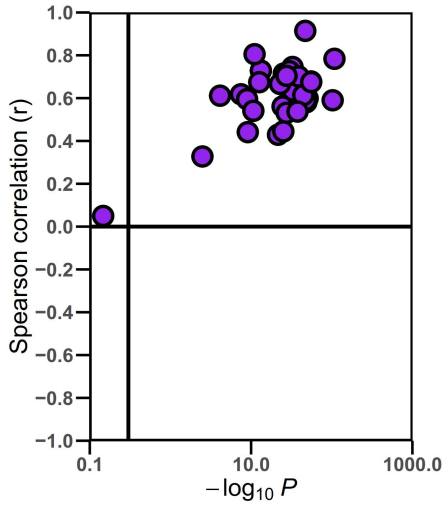

Correlation between ASF1B and DHFR in pan-cancers

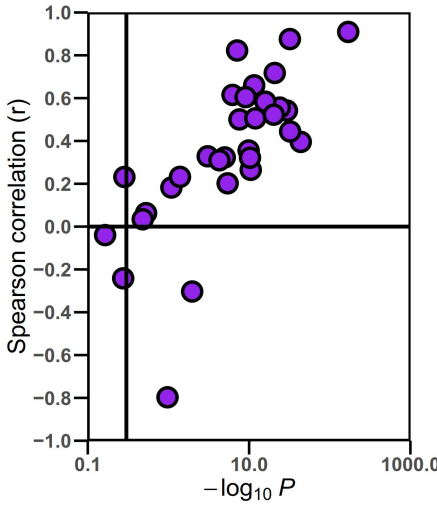

Correlation between ASF1B and POLE3 in GTEx

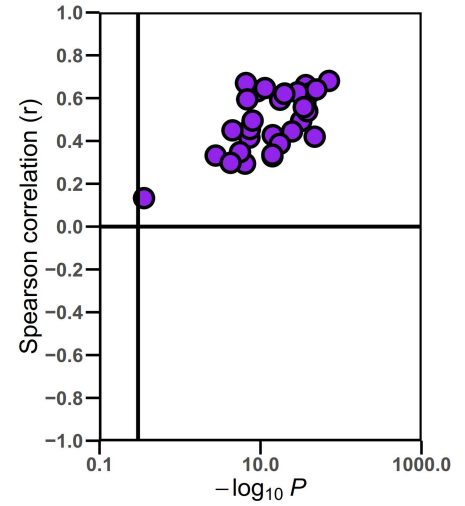

Correlation between ASF1B and POLE3 in pan-cancers
