# Supplementary material for: ASF1B Promotes Oncogenesis in Lung Adenocarcinoma and Other Cancer Types
Source: PubMed Central journal article supplement (PMC8459715; doi:10.3389/fonc.2021.731547), 2021-09-09

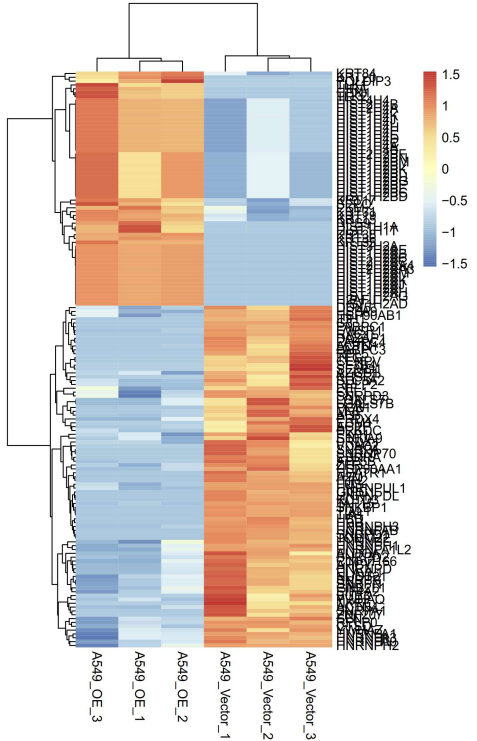

Cutoff for logFC is 0.5  
 The number of up gene is 86  
 The number of down gene is 192

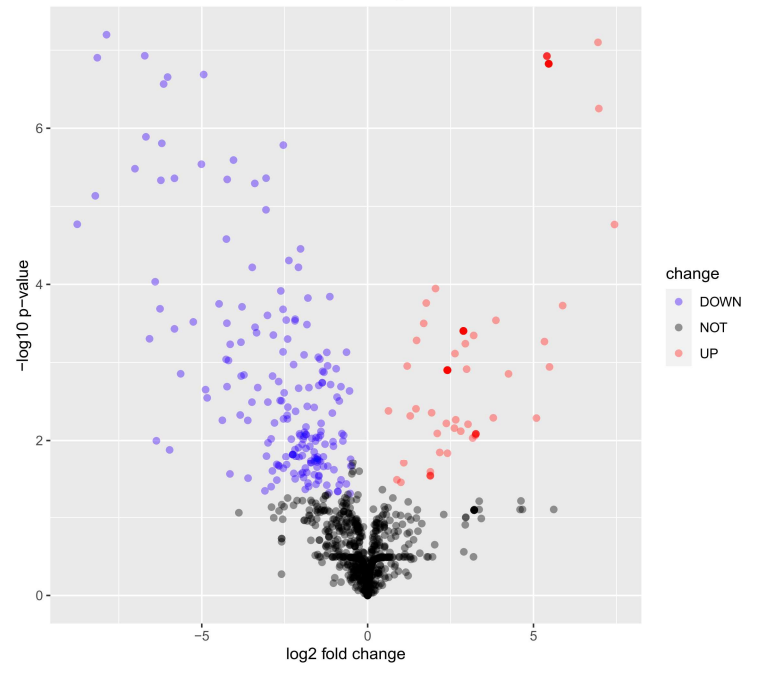

Supplement: DataSheet_8.pdf [file DataSheet_8.pdf]
